# Supplementary material
Source: publisher site journal article supplement (https://www.dovepress.com/article/549332)
Supplement: Supplementary file 1 [file Supplementary%20material_interview%20guide%2010%20week_1.docx]

*Supplementary material 1: Interview guide.*

*Interviews:***Interview Guide – Individuals Who Have Completed 10 Weeks of Pulmonary Rehabilitation (TELE)**

*Note: This guide has been translated from Danish to English, without adaptation to other cultural contexts.*

**Purpose of the study:** To investigate reasons for patients with COPD to complete 10-week of pulmonary rehabilitation.

| Domains | Constructs | Interview Questions | Notes |
| --- | --- | --- | --- |
| 1.  *Knowledge (1)* | Knowledge  Processual knowledge | **What did you know about pulmonary rehabilitation before you started?**   - Supportive questions: - - Why did you decline pulmonary rehabilitation? - Where did you hear about pulmonary rehabilitation? |  |
| 2.  *Intentions (8)* | Stability of intensions  Steps in the stages of change model | **Will you tell a bit on why you accepted to participate in the project?**   - Supportive questions: - What was the most important reason for you to participate? - Was it important that you could receive pulmonary rehabilitation from home? |  |
| 3.  *Memory, attention and decision processes (10)* | Memory  Attention  Attention control  Decision making  Cognitive overload / tiredness | **How did your close relations react when you decided to participate?**  Supportive questions:   - Did you experience support from your social circle - What do they think about you having completed the program   **Did their attitude affect your decision?** |  |
| 4.  *Social influences (12)* | Social press  Social norms  Group conformity (adaptation)  Social comparison  Group norms  Social support  Conflicts in the group  Alienation  Group identity  Being a role model | **How do you think that your participation has affected others?**  (for example others in the same situation as you)  Supportive questions:   - Could you try to elaborate? - Have you felt that you got support from the others in the group (do not apply for HPR group)? - Do you believe that it would be beneficial to involve relatives/close relations in pulmonary rehabilitation?   **What impact has it had that you received support from healthcare professionals during the program?** |  |
| 5.  *Environmental context and resources (11)* | Contextual stressors  Resources  Organisational culture /climate  Prominent / critical events  Person – environment interaction  Barriers and facilitators | **What did it mean for you to be able to attend pulmonary rehabilitation from home?**  Supportive questions:   - Did you feel safe attending from home? - In your opinion, should pulmonary rehabilitation be offered from home?   **What are the advantages / disadvantages of attending from home?** |  |
| 6.  *Emotions (13)* | Fear  Anxiety  Affect  Stress  Depression  Positive/Negative affect  burnout | **What emotions did you experience in connection with lung rehabilitation and when completing it?**  (joy/pride/sadness/other)  Supportive Question:   - What did that mean to you? |  |
| 7.  *Skills (2)* | Skills  Development of skills  Competence  Abilities  Interpersonal skills  Practice/exercise  Assessment of skills | **What did you learn from attending pulmonary rehabilitation?**  (cognitively / physically / socially)  **What do you think it requires to complete 10 weeks pulmonary rehabilitation?**  Your skills/ others’ skills? |  |
| 8.  *Beliefs about capabilities (8)* | Confidence  Perceived competence  Self-efficacy  Perceived behavior control  Beliefs  Self-esteem  Empowerment  Professional confidence | **How much confidence do you have in applying what you have gone through over the past 10 weeks in your daily life?**  (for instance be more physically active, take your medication correctly, focus on breathing exercises, management of energy in your daily life etc.)   - Supportive questions: - - What would be easy for you to get started with right away? - What would make it difficult? - What kind of support would you need and who could provide it? |  |
| 9.  *Social/*  *professional role and identity (3)* | Professional identity  Professional role  Social identity  Professional boundaries  Professional trust  Group identity  Leadership  Organisational engagement | **What impact did it have that the pulmonary rehabilitation took place with others? (TELE)**  Supportive questions:   - What did you gain from exercising together with others? - Has it been meaningful to exercise with others? - How did you imagine pulmonary rehabilitation via tablet would be prior your start? - Are you used to using a tablet, smart phone, internet? - Did you feel safe exercising at home and via tablet? - Do you think that others in your situation might benefit from tele-rehabilitation?   **What do you think it takes for others for complete TELE-training?** |  |
| 11.  *Beliefs about consequences (6)* | Convictions  Expectations of outcome  Expected regret  Consequences | **What have you gained by completing pulmonary rehabilitation?**  Supportive questions:   - What has been good about participating and completing the program? - Do you think anything should have been done differently?   **Do you think your completion will make a difference in your daily life?**  **What separates this time from other times?** |  |
| 10.  *Optimism (5)* | Optimism  Pessimism  Unrealistic optimism  Identity | **What benefits do you think lung rehabilitation has had for you?**  Supportive questions:   - Did you have any expectations about the benefits when you started? - How can you feel these benefits in your daily life? - Has it brought optimisms into your daily life?   **What drawbacks have there been for you in participating?** |  |
| 12.  *Goals (9)* | Goal  Prioritizing of goals  Objectives  Goal (autonomous / controlled)  Action plan  Intention on implementation | **What is the most important that you have learned the past 10 weeks?**  Supportive questions:   - How will you use it in daily life? - What do you think your next goal should be? (for instance completion of a 65-weeks maintenance program or a” smaller” goal in your daily life) |  |
| 13.  *Behavioural regulation (14)* | Self-monitoring  Breaking habits  Plan to take action | **What will you do differently in your daily life to maintain the good habits?**   - Supportive questions: - Can you give some examples? (for instance, physical activity, focus on medication, energy management, other?) - When will you start with the “new habits”? And how will you do it? - Who can support you in this?   **What is the most important thing you take with you from the last 10 weeks?** |  |
| 14.  *Reinforcement (7)* | Rewards  Incentives  Punishment  Consequences  Reinforcement  Contingencies  Sanctions | **What will it take for you to complete the maintenance program?**  Supportive questions:   - What is the primary reason you would like to accept the offer for maintenance training? - What is important for you? |  |
